# Supplementary material
Source: PubMed Central journal article supplement (PMC4539373)
Supplement: MCB.00196-15_zmb999100954so1.pdf [file MCB.00196-15_zmb999100954so1.pdf]

**Supplemental material****Supplemental Table 1: Primers for qPCR analysis**

| <b>Primer Name</b> | <b>Sequence</b>          |
|--------------------|--------------------------|
| mIL6 for           | CTGCAAGAGACTTCCATCCAGTT  |
| mIL6 for           | GAAGTAGGGAAGGCCGTGG      |
| hIL6 for           | GGCACTGGCAGAAAACAACC     |
| hIL6 rev           | GCAAGTCTCCTCATTGAATCC    |
| mRSP12 for         | GAAGCTGCCAAAGCCTTAGA     |
| mRSP12 rev         | AACTGCAACCAACCACCTTC     |
| hRPL28 for         | GCAATTCCTTCCGCTACAAC     |
| hRPL28 rev         | TGTTCTTGCGGATCATGTGT     |
| mIkB $\alpha$ for  | AAATCTCCAGATGCTACCCGAGAG |
| mIkB $\alpha$ rev  | ATAATGTCAGACGCTGGCCTCCAA |
| hIkB $\alpha$ for  | GCACCTCCACTCCATCCTGAAGG  |
| hIkB $\alpha$ rev  | CCATTACAGGGCTCCTGAGCATTG |
| mIL6 -400 for      | AGCCTCTTATTCATGTGTGTGTG  |
| mIL6 -400 rev      | CAGCACTTGAGCATGTCTTGA    |
| mIL6 -300 for      | TCCCATCAAGACATGCTCAA     |
| mIL6 -300 rev      | GGGGCTGATTGGAAACCTTA     |
| mIL6 -200 for      | AAGCACACTTTCCTCCT        |
| mIL6 -200 rev      | TCATGGGAAAATCCCACATT     |
| mIL6 -100 for      | CAATCAGCCCCACCACTCTGG    |
| mIL6 -100 rev      | TTCTTGGTGGGCTCCAGAGCAGAA |
| mIL6 TSS for       | AATGTGGGATTTCCCATGA      |
| mIL6 TSS rev       | GCTCTCTGCCTCACACTCCT     |

|                        |                      |
|------------------------|----------------------|
| mIL6 +100 for          | CTGGCGGAGCTATTGAGACT |
| mIL6 +100 rev          | TGGTTGTCACCAGCATCAGT |
| mIL6 +200 for          | TTTTCTCCACGCAGGAGACT |
| mIL6 +200 rev          | TCCACGATTTCCAGAGAAC  |
| mIkB $\alpha$ -100 for | AAAGTTCCTGTGCATGACC  |
| mIkB $\alpha$ -100 rev | CTGGCAGGGGATTTCTCAG  |
| mMLL1 for              | ACCCCGGAAGTGCTCGGTCA |
| mMLL1 rev              | GCTCGGCTGAACTCCTGGGC |
